# Supplementary material
Source: PubMed Central journal article supplement (PMC3132948)
Supplement: Supp_Fig.pdf [file Supp_Fig.pdf]

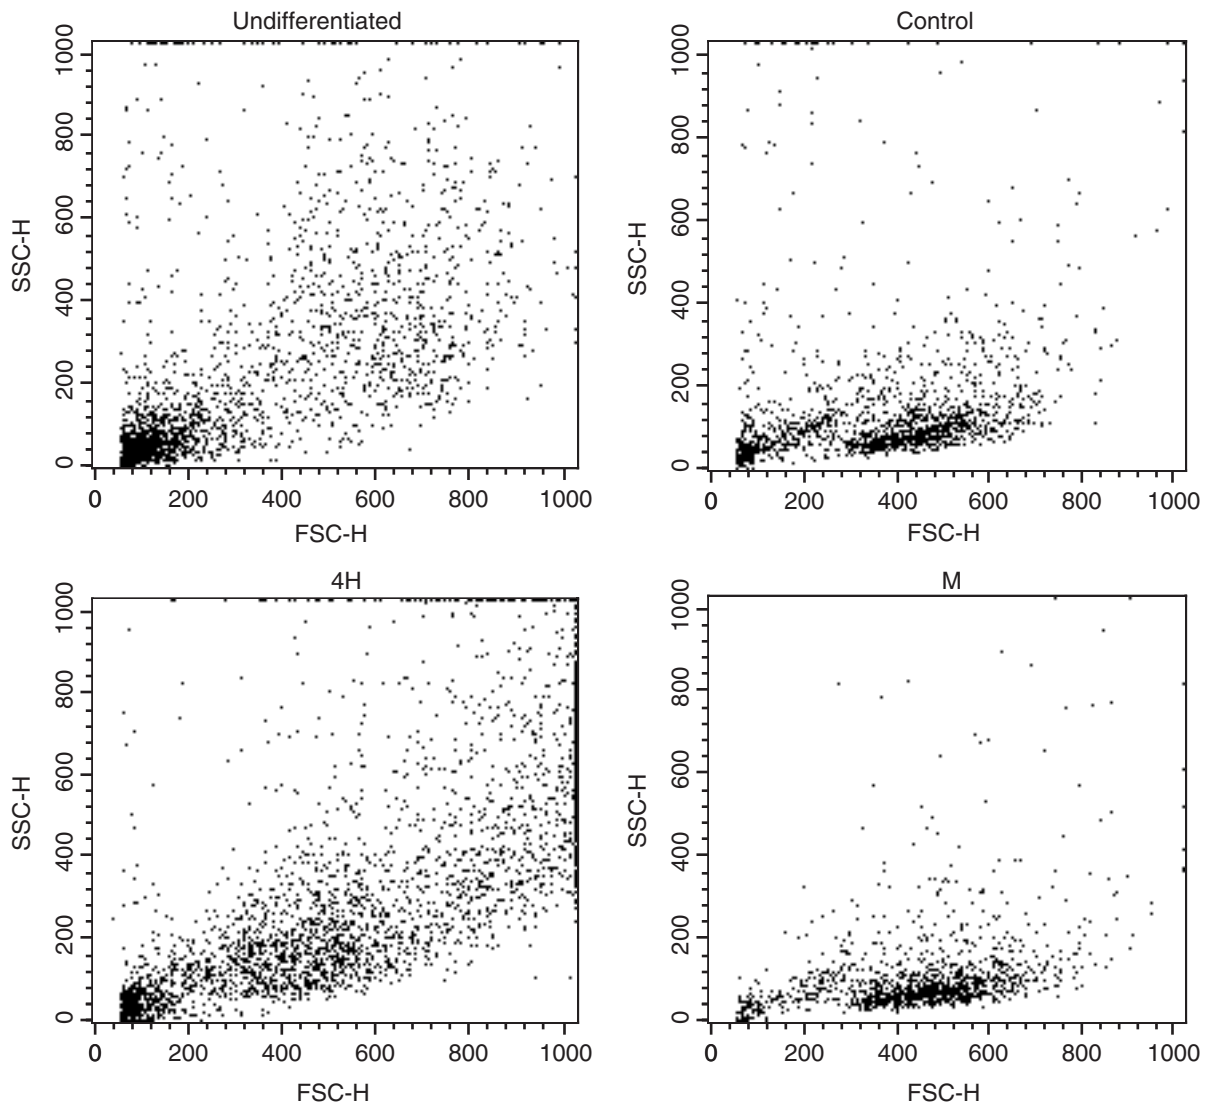

**SUPPLEMENTARY FIG. 1.** The forward scatter, given as dimensionless measures of mean fluorescence intensity, shows the relative size of the cell populations obtained in this study. The control treatment cells were the smallest, while the largest cells were obtained by treatment with BMP-4 + TGF- $\beta$ 3.
